1     **Inhibition of tRNA Synthetases Induces Persistence in *Chlamydia***

2

3                                     Nathan D. Hatch, Scot P. Ouellette<sup>#</sup>

4             <sup>1</sup>Department of Pathology and Microbiology, College of Medicine, University of Nebraska

5                                     Medical Center, Omaha, NE

6

7     Keywords: *Chlamydia*, persistence, IFN $\gamma$ , amino acid starvation, tRNA synthetases, tryptophan,

8     leucine

9

10    Running Title: tRNA synthetase inhibitor effects on *Chlamydia*

11

12

13    <sup>#</sup>Corresponding Author:

14    Department of Pathology and Microbiology, College of Medicine, University of Nebraska Medical

15    Center, 985900 Nebraska Medical Center (DRC2 5022), Omaha, NE

16    Tel: +1-402-559-0763 Fax: +1-402-559-5900 Email: [scot.ouellette@unmc.edu](mailto:scot.ouellette@unmc.edu)

17

18 **Abstract**

19 *Chlamydia trachomatis* is the leading cause of bacterial sexually transmitted infections, and *C.*  
20 *pneumoniae* causes community-acquired respiratory infections. *In vivo*, the host immune system  
21 will release interferon-gamma (IFN $\gamma$ ) to combat infection. IFN $\gamma$  activates human cells to produce  
22 the tryptophan (trp) catabolizing enzyme, IDO. Consequently, there is a reduction in cytosolic trp  
23 in IFN $\gamma$ -activated host cells. In evolving to obligate intracellular dependence, *Chlamydia* has  
24 significantly reduced its genome size and content as it relies on the host cell for various nutrients.  
25 Importantly, *C. trachomatis* and *C. pneumoniae* are trp auxotrophs and are starved for this essential  
26 nutrient when the human host cell is exposed to IFN $\gamma$ . To survive this, chlamydiae enter an  
27 alternative growth state referred to as persistence. Chlamydial persistence is characterized by a  
28 halt in the division cycle, aberrant morphology, and, in the case of IFN $\gamma$ -induced persistence, trp  
29 codon-dependent changes in transcription. We hypothesize that these changes in transcription are  
30 dependent on the particular amino acid starvation state. To investigate the chlamydial response  
31 mechanisms acting when other amino acids become limiting, we tested the efficacy of prokaryotic  
32 specific tRNA synthetase inhibitors, indolmycin and AN3365, to mimic starvation of trp and  
33 leucine, respectively. We show that these drugs block chlamydial growth and induce changes in  
34 morphology and transcription consistent with persistence. Importantly, growth inhibition was  
35 reversed when the compounds were removed from the medium. With these data, we find that  
36 indolmycin and AN3365 are valid tools that can be used to mimic the persistent state independently  
37 of IFN $\gamma$ .

38 **Word Count: 248/250**

39

40 **Importance**

41           The obligate intracellular pathogen *Chlamydia trachomatis*, although treatable, remains a  
42 major public health concern due to rising infection rates. The asymptomatic nature of most  
43 *Chlamydia* infections is hypothesized to be a product of its ability to transition into a slow-growing  
44 state referred to as persistence. The most physiologically relevant inducer of persistence is the  
45 immune cytokine IFN $\gamma$ , which in humans activates an enzyme that degrades tryptophan, an  
46 essential amino acid that *Chlamydia* scavenges from the host cell. Unfortunately, the exact timing  
47 at which *Chlamydia* is starved after IFN $\gamma$  treatment is inexact. To mechanistically study  
48 persistence using genetic tools, an experimental model where amino acid starvation can be induced  
49 at specific times is needed. Here, we demonstrate the capability of tRNA synthetase inhibitors,  
50 indolmycin and AN3365, to model persistence independently from the use of IFN $\gamma$ . These tools  
51 will also allow comparisons between amino acid stress responses in this unique bacterium.

52 **Word Count: 149/150**

## 53 **Introduction**

54 Chlamydial diseases are significant causes of morbidity in humans. *Chlamydia trachomatis*  
55 is the leading cause of bacterial sexually transmitted infections in the world. In 2017, the U.S.  
56 Centers for Disease Control and Prevention received over 1.7 million reports of chlamydial  
57 infections (1). This number is likely an underestimate due to most infections being asymptomatic  
58 and, therefore, undetected (2). The strains responsible for these infections are primarily confined  
59 to the urogenital serovars, D-K, but can also contain those of the invasive serovars, L1-L3.  
60 Untreated *C. trachomatis* urogenital infections can ascend the genital tract, potentially leading to  
61 pelvic inflammatory disease and tubal factor infertility (3). *Chlamydia pneumoniae* is a respiratory  
62 pathogen responsible for approximately 10% of community acquired cases of pneumonia. The  
63 presence of antibodies in over 50% of adults in the United States, as well as several other countries,  
64 suggests infection with *C. pneumoniae* is relatively common (see (4) for extended review).  
65 Additionally, long term sequelae such as atherosclerosis and adult-onset asthma have been  
66 associated with *C. pneumoniae* infection (5, 6).

67 Chlamydiae are obligate intracellular bacteria that require a host cell to complete their  
68 developmental cycle. Chlamydial development involves interconversion between two distinct  
69 developmental forms: the elementary body (EB) and the reticulate body (RB). EBs are infectious,  
70 metabolically quiescent, environmentally stable, and compact in size (0.3  $\mu\text{m}$ ). RBs are the non-  
71 infectious, metabolically active, replicative form that measure approximately 0.8  $\mu\text{m}$  in diameter  
72 (as reviewed in (7)). After initial attachment, EBs are internalized into an endocytic vesicle of the  
73 host cell and begin primary differentiation into RBs. Soon thereafter, chlamydial proteins are  
74 secreted into the vesicle membrane and host cell cytosol to prevent targeting of the chlamydial-  
75 containing vacuole to the lysosome. This modified endosome is known as the chlamydial inclusion



76 and is a protective vacuole that masks the invading organisms from host cell defenses for the  
77 entirety of their development (8). Following the establishment of the inclusion and primary  
78 differentiation into an RB, the organism rapidly multiplies by a polarized budding mechanism (9).  
79 *Chlamydia* asynchronously undergo secondary differentiation into EBs until the organisms are  
80 released from the cell through lysis or extrusion. The duration of this developmental process is  
81 approximately 48 hours for *C. trachomatis* or 72 hours for the slower growing *C. pneumoniae*.

82 During infection, host immune cells respond to *Chlamydia* by releasing the cytokine  
83 interferon-gamma (IFN $\gamma$ ) (10). IFN $\gamma$  will bind its receptor and activate multiple signaling  
84 pathways. The major IFN $\gamma$ -induced antichlamydial effector in human cells is indoleamine 2,3-  
85 dioxygenase (IDO) (11). IDO will catabolize cytosolic tryptophan (trp) into N<sup>1</sup>-formylkynurenine,  
86 a metabolite that cannot be used by *C. trachomatis* or *C. pneumoniae* (11-14). Although IFN $\gamma$   
87 regulates over 200 human genes (15), IDO expression, with the resulting depletion of available trp  
88 (16, 17) and decrease in translation (18), is the driving factor for inhibiting chlamydial growth  
89 (Figure 1). This is supported by the ability to restore growth in cell culture by adding additional  
90 trp to the media, by pharmacologically inhibiting IDO in the presence of IFN $\gamma$ , or by using IDO  
91 mutant cells (19-21).

92 Because *C. trachomatis* and *C. pneumoniae* are trp auxotrophs and depend on host trp to  
93 grow, they must respond to this starvation condition to maintain viability (22). Interestingly,  
94 *Chlamydia* has eliminated the stringent response (*relA/spoT*), which is used by most eubacteria to  
95 respond to amino acid starvation (22, 23). This raises the intriguing question of how they respond  
96 to amino acid limitation. Phenotypically, chlamydial RBs transition into an alternative  
97 developmental state termed persistence to cope with this stress (16). Persistent chlamydiae are  
98 thought to be associated with the chronic sequelae linked to chlamydial diseases. Importantly,

99 various stressors can trigger persistence and not all persistent transcriptomic and proteomic  
100 responses are the same (as reviewed in (24)). Nevertheless, persistence models are characterized  
101 by bacteria (i) remaining viable yet non-infectious, (ii) being non-replicative, (iii) exhibiting an  
102 aberrant morphology, (iv) and reactivating to resume the development cycle after the stress is  
103 removed (18, 25). Importantly, and as it relates to IFN $\gamma$ -induced persistence, transcriptomic and  
104 proteomic changes also occur, and these changes are predictable based on the trp content of the  
105 transcript or protein (26).

106 The mechanisms for entry into, maintenance of, and exit from persistence are not known,  
107 and investigation of these mechanisms is made difficult by the nature of inducing persistence  
108 through IFN $\gamma$  exposure. Therefore, it is important to be able to study *Chlamydia*'s transition into  
109 persistence while simultaneously controlling for as many variables as possible, demonstrating a  
110 need for an amino acid starvation model without the confounding variables that come with using  
111 IFN $\gamma$ . In an effort to reproduce and model IFN $\gamma$ -induced persistence in the absence of IFN $\gamma$ , the  
112 most straightforward approach is to remove trp from the culture medium. However, this will  
113 induce host cell autophagy and lysosomal degradation of proteins, which can regenerate amino  
114 acid pools that *Chlamydia* can scavenge (27).

115 We hypothesized that bacterial tRNA synthetase inhibitors would offer an alternative  
116 pathway to decrease translation in *Chlamydia* in an amino acid-dependent manner (Figure 1).  
117 These inhibitors would, therefore, afford an opportunity to specifically mimic starvation for  
118 different amino acids to compare and contrast amino acid starvation responses in *Chlamydia*. We  
119 show that combining trp depleted media with the trp analog, indolmycin, is sufficient to induce  
120 persistence in *Chlamydia* in cell culture. Indolmycin is a tryptophanyl-tRNA synthetase inhibitor  
121 that acts through competitive inhibition as a trp analog (28). Additionally, AN3365, a leucyl-tRNA

122 synthetase inhibitor, was used in this study to investigate the possibility of inducing persistence  
123 through the starvation of an amino acid other than trp. AN3365 is an antibiotic in the aminomethyl  
124 benzoxaborole class shown to be active against Gram-negative bacteria (29). Unlike indolmycin,  
125 AN3365 is a non-competitive inhibitor of bacterial leucyl-tRNA synthetases that locks the protein  
126 in its editing conformation, preventing release of charged leucyl-tRNAs (29). These tools will  
127 facilitate the modeling of specific amino acid starvation responses in *Chlamydia* without affecting  
128 the host cells. Here, we validate the use of these compounds, indolmycin and AN3365, as tools  
129 that can be used within the chlamydial field to investigate mechanisms engaged by *Chlamydia* to  
130 enter, maintain, and exit persistence in response to amino acid starvation.

131 **Results**

132 **The bacterial tRNA synthetase inhibitors indolmycin and AN3365 block chlamydial growth.**

133 To determine whether the bacterial tRNA synthetase inhibitors indolmycin and AN3365  
134 were effective against *Chlamydia*, we measured inclusion forming units (IFU) as a metric for  
135 chlamydial growth in the presence and absence of the inhibitors. Initial empirical experiments with  
136 indolmycin, a competitive inhibitor for tryptophanyl-tRNA charging, revealed that it had an impact  
137 on growth at 120  $\mu$ M or higher and in the presence of 1 mg/L trp or lower (data not shown). We  
138 chose to perform this and all subsequent experiments with indolmycin by adding it at 120  $\mu$ M  
139 concentration in the absence of trp at 10 hpi. Under these conditions, indolmycin treatment reduced  
140 the generation of IFUs to the limit of detection of the assay (Figure 2A). To determine the effective  
141 concentration for AN3365, we performed a dose response assay and observed that concentrations  
142 in excess of 250 ng/mL (added at 10 hpi) were sufficient to reduce chlamydial growth to basal  
143 levels (i.e. near limit of detection, Fig. 2B). Importantly, as a non-competitive inhibitor of leucyl-  
144 tRNA charging, AN3365 was effective in the presence of normal media levels of leucine (105  
145 mg/L). AN3365 was also effective at blocking chlamydial growth when added at various time  
146 points up to 12 hpi during the developmental cycle (Fig. 2C). From these data, we conclude that  
147 indolmycin and AN3365 effectively blocked chlamydial growth. Nevertheless, a lack of  
148 recoverable IFUs suggests one of three outcomes: i) complete loss of viability, ii) decrease in the  
149 rate of development (i.e. prolonged RB-only phase), or iii) entry into persistence.

150

151 **Indolmycin and AN3365 induce morphological aberrance in *C. trachomatis*.**

152 To help distinguish between the possible reasons for a loss in recoverable IFUs,  
153 immunofluorescence microscopy was used to analyze chlamydial morphology (Fig. 3). HEp-2  
154 cells were infected with *C. trachomatis* serovar L2, treated or not with the indicated compounds  
155 at 10 hpi or pre-treated with IFN $\gamma$  as described in Materials and Methods, and fixed and processed  
156 for imaging at 24 hpi. Both indolmycin and AN3365 treatment resulted in noticeably larger  
157 individual organisms, similar to that observed during IFN $\gamma$  treatment (16). Electron microscopic  
158 analysis of organisms treated with inhibitors also revealed aberrant morphology (Suppl. Fig. 1).  
159 Interestingly, the labeling of MOMP was not uniform around the membrane of the organisms in  
160 the treated cells. The *ompA* gene encodes 30 leu (L) and 7 trp (W) codons. Decreased availability  
161 of L or W may therefore negatively impact translation of MOMP that in turn may lead to non-  
162 uniform localization along the organism's membrane (see also (16)). Conversely, Hsp60\_1, which  
163 contains 0 W codons, appeared abundant in both indolmycin and IFN $\gamma$ -treated samples.  
164 Interestingly, Hsp60\_1 is also abundant in the AN3365 treated sample despite the presence of 45  
165 L codons. These observations are consistent with what has been previously described during IFN $\gamma$ -  
166 induced persistence (12). Taken together, these morphological data in conjunction with the IFU  
167 data presented above support the conclusion that the organisms are non-replicative, display an  
168 aberrant morphology, and are not proceeding through the normal developmental cycle.

169

#### 170 **Removal of indolmycin and AN3365 rescues *C. trachomatis* growth and morphology.**

171 A key characteristic of persistence is its reversibility such that the organism can revert back  
172 to a developmentally competent RB. To determine whether or not *C. trachomatis* remains viable  
173 under indolmycin or AN3365 treatment, we attempted to rescue the organisms by removing each  
174 treatment (Fig. 4). HEp-2 cells were infected with *C. trachomatis* serovar L2 and treated or not

175 with the designated compounds at 10 hpi. Treatment media was aspirated at 24 hpi, and samples  
176 were washed 3x with DPBS before replenishing with DMEM. After 24 and 48 hour recovery  
177 periods following drug removal, IFUs were quantified and organism morphology was assessed. In  
178 the presence of indolmycin and AN3365, chlamydial growth was inhibited up to 72 hpi (Figure  
179 4A). After removal of these compounds from the medium, chlamydial growth was restored as  
180 represented by a logarithmic increase in IFUs at 48 (24h post recovery) and 72 (48h post recovery)  
181 hpi. These IFU data were corroborated by the detection of normal morphological forms at these  
182 time points that were indistinguishable from 24 and 48 hpi untreated organisms (Figs. 4B-D).  
183 Moreover, recoverable IFUs were intermediate between that observed at the 24 and 48 hpi  
184 untreated groups. This is expected when considering treatment time at 10 hpi essentially pauses  
185 the development cycle. After 24 hours of recovery, the organisms have undergone approximately  
186 34 hours of development. We conclude that the effects of indolmycin and AN3365 are reversible,  
187 consistent with what is observed during the removal of IFN $\gamma$  from persistent cultures (18, 25, 30).  
188 Collectively, the data presented in Figures 2-4 indicate that the tRNA synthetase inhibitors induce  
189 a persistent growth state that is reversible upon removal of the compounds.

190

### 191 **Indolmycin and AN3365 induce morphological aberrance in *C. pneumoniae*.**

192 Although the underlying mechanisms of persistence are unknown, we hypothesize that they  
193 are conserved between *C. trachomatis* and *C. pneumoniae*. *C. pneumoniae* is a slower growing  
194 species compared to *C. trachomatis*, particularly the L2 serovar, suggesting it would be equally, if  
195 not more, sensitive to tRNA synthetase inhibitors. Therefore, we suspected the use of indolmycin  
196 and AN3365 on *C. pneumoniae* would produce a phenotype similar to that observed during IFN $\gamma$   
197 exposure. To test this, we infected HEp-2 cells with *C. pneumoniae* AR39. Samples were treated

198 or not with the designated compound at 24 hpi or with IFN $\gamma$  at time of infection. As seen in Figure  
199 5, the morphologies of organisms treated with indolmycin or AN3365 closely resemble those  
200 treated with IFN $\gamma$ . We conclude from these data that tRNA synthetase inhibitors are broadly  
201 applicable to study persistence in *Chlamydia* species.

202

203 **The bacterial tRNA synthetase inhibitors induce transcriptional changes consistent with**  
204 **IFN $\gamma$ -mediated persistence.**

205 To determine whether the tRNA synthetase inhibitors induce transcriptional changes  
206 consistent with persistence, nucleic acids were isolated from infected cultures, and the abundance  
207 of selected transcripts was measured and normalized to genomic DNA content. Increased  
208 transcription of *euo* has been previously associated with IFN $\gamma$ -mediated persistence (18, 30). This  
209 elevated transcriptional response was observed in both *C. trachomatis* (beginning at 4h post  
210 treatment) and *C. pneumoniae* when exposed to either indolmycin or AN3365 treatments and  
211 resembled IFN $\gamma$ -induced persistence (Fig. 6A). In addition to *euo*, *groEL\_1* has also been  
212 implicated in persistence and general stress response (30). We analyzed the abundance of *groEL\_1*  
213 transcripts in both *C. trachomatis* and *C. pneumoniae* under each treatment (Fig. 6B). In agreement  
214 with previous findings, *groEL\_1* transcripts remained unchanged (<1.5x difference) in *C.*  
215 *trachomatis* between 10 and 24 hpi in IFN $\gamma$ -treated samples, whereas *groEL\_1* transcripts  
216 decreased in abundance during the same timeframe in the untreated samples (18). Interestingly,  
217 indolmycin-treated samples closely mirrored the effects of IFN $\gamma$  while AN3365 treatment resulted  
218 in a 4-5 fold increase of *groEL\_1* transcripts at the 24 hour time point. Conversely, for *C.*  
219 *pneumoniae*, all treatment conditions followed a similar transcript pattern as in untreated samples  
220 for *groEL\_1*. This is also consistent with previous observations for IFN $\gamma$ -induced persistence in

221 this organism (18). Additionally, indolmycin treatment resulted in a rapid (4h) and large increase  
222 in *trpB* transcripts (*C. pneumoniae* does not encode *trpB*), a gene that is repressed under trp-replete  
223 conditions (Fig. 6C and (31)). This suggests *C. trachomatis* has detected and is quickly responding  
224 to a lack of trp. Moreover, there is a noticeable increase in *trpB* transcripts at 24 hpi following  
225 AN3365 treatment (3-4 fold increase). Considering the lack of change observed at 14 hpi, the  
226 increase of *trpB* transcripts at 24 hpi may be an indirect effect caused by a cascade of responses  
227 rather than an immediate reaction to leu limitation. It is important to note that while *C. trachomatis*  
228 detects trp limitations when cultured in trp-deplete media (no indolmycin), the abundance of *euo*  
229 transcripts does not change (Suppl. Fig. 2). Therefore, removing trp from the medium cannot be  
230 used as a reliable IFN $\gamma$ -free model for persistence, particularly for faster growing species and  
231 strains of *Chlamydia*.

232

233 **Transcript levels of the 3' end of the *ytg* operon are reduced in *Chlamydia* during indolmycin**  
234 **or AN3365 treatment.**

235 To determine whether indolmycin and AN3365 could mimic a more nuanced characteristic of  
236 IFN $\gamma$ -induced persistence, we looked to the *ytgABCD* operon (26). As previously described by  
237 Ouellette et al. (32), IFN $\gamma$  treatment results in Rho-dependent polarization of the *ytg* operon. This  
238 results in a skewed ratio of *ytgA:ytgD* transcripts. During the normal developmental cycle, this  
239 ratio is approximately 5-10 but increases to over 30-fold or higher during IFN $\gamma$ -mediated trp  
240 starvation. We hypothesized that this skew was caused by ribosome stalling along the transcript  
241 due to the lack of charged tRNAs, which allows Rho to bind internal *rut* sites to terminate  
242 transcription prematurely (32). Of note, within the *ytgC* gene is the presence of three tandem W  
243 codons, and the gene encodes additional W residues. L residues are highly abundant in the operon



244 with 98 total residues in *ytgB* and *ytgC* and a total of 11 LL motifs in *C. trachomatis*. We reasoned  
245 that both indolmycin and AN3365 should produce the same phenotype as a result of the stalling  
246 of ribosomes on trp codons, in the case of indolmycin treatment, or leu codons, in the case of  
247 AN3365 treatment, respectively. We quantified *ytgA* and *ytgD* transcripts at different times after  
248 addition of the tRNA synthetase inhibitors (at 10hpi for Ctr, 24hpi for Cpn) and compared the  
249 ratios to those from IFN $\gamma$ -treated cultures. As anticipated, both indolmycin and AN3365 treated  
250 samples resembled the IFN $\gamma$ -induced persistent state with regards to the polarity of the *ytg* operon,  
251 shown in Figure 7 as a disproportionate level of *ytgA* to *ytgD* transcripts. Interestingly, differences  
252 in the Ctr *ytgA*:*ytgD* ratio were observed within four hours of treatment (14hpi) and were more  
253 pronounced for L limitation (AN3365) than for W limitation (indolmycin or IFN $\gamma$ ) (Fig. 6A). This  
254 is consistent with the larger number of L versus W residues in the operon. However, by 24hpi, the  
255 *ytgA*:*ytgD* ratio for all treatments was similar, possibly reflecting a recovery in read-through  
256 potential in AN3365-treated cultures. For Cpn, all treatments resulted in the expected increase in  
257 *ytgA* transcripts in proportion to *ytgD* transcripts when measured at 48hpi (after treatment at  
258 24hpi). Overall, these data demonstrate that the tRNA synthetase inhibitors recapitulate key  
259 characteristics of amino acid starvation in *Chlamydia*.

260

## 261 Discussion

262 Persistence is an important but poorly understood aspect of chlamydial diseases. The  
263 immunological basis for inducing persistence in cell culture was first described by Beatty et al. in  
264 1993, who described the effects of IFN $\gamma$ , and its reversibility, on chlamydial growth and  
265 morphology in human cell lines (12, 16, 25). These effects were connected with the ability of  
266 human IFN $\gamma$  to induce a tryptophan-limiting environment in the cell by activating IDO expression  
267 (12). Broadly speaking, these effects are likely mediated by the inability to efficiently translate  
268 key proteins enriched in trp residues (see Fig.1 and (18, 33, 34)). More recent studies have  
269 characterized transcriptional and translational changes associated with IFN $\gamma$ -mediated persistence  
270 (18, 30). More importantly, these “persistence” characteristics as defined in cell culture models  
271 have recently been observed in patient samples (13). This underscores the need to have a better  
272 mechanistic understanding of how amino acid limitation results in a persistent phenotype.

273 In 2011, the Clarke group published the first study demonstrating stable transformation of  
274 *Chlamydia trachomatis* serovar L2 (35). This advance, common for decades in other bacterial  
275 systems, has allowed fluorescent tagging of target proteins and reverse genetic tools to be applied  
276 to *Chlamydia* (36-40). However, serovar L2 is among the fastest growing strains of *C. trachomatis*  
277 (41), and slower growing strains and species of *Chlamydia* have proven more difficult to  
278 transform. As it relates to genetic studies of IFN $\gamma$ -induced persistence, this creates a hurdle. When  
279 IFN $\gamma$  is added to cell cultures, removal of trp from the cytosol by IDO is gradual and takes  
280 approximately 24 h. This is a time during the L2 developmental cycle when RBs are differentiating  
281 to EBs and EBs are rapidly accumulating (e.g. Fig. 2A). For IFN $\gamma$  to be effective, pretreatment of  
282 host cells with IFN $\gamma$  prior to infection is required, yet this strategy is inconsistent. To induce a  
283 persistent state in serovar L2, we recently published a protocol that described the pretreatment of

284 cells with IFN $\gamma$  prior to infection followed by the addition of IFN $\gamma$ -conditioned medium at 10 hpi  
285 (32). This allows IDO to be sufficiently expressed and trp to be catabolized, resulting in small  
286 inclusions that contain relatively few aberrant organisms approximately 24 hours post infection  
287 (hpi). While this protocol elicited reproducibly persistent forms for us, differences between labs,  
288 the cell types used, and batches of IFN $\gamma$  (which require careful titration for effective dose) may  
289 not make it easily transferable to other systems. This can lead to discrepancies in findings since  
290 too much IFN $\gamma$  exposure prevents primary differentiation of chlamydial EBs to RBs, while too  
291 little results in mixed populations of persistent and normal organisms within a culture (20). In sum,  
292 the field would benefit greatly from a tool that allows reproducible induction of persistence and  
293 that minimizes confounding variables while maximizing control and flexibility of experimental  
294 design parameters.

295         Here, we sought to evaluate the effects of characterized bacterial tRNA synthetase  
296 inhibitors (28, 29, 42) for their ability to induce persistence in *Chlamydia* as a first step in  
297 developing systems that would allow us to mechanistically address this alternative growth state.  
298 Such an approach would offer immediate advantages over IFN $\gamma$ -mediated tryptophan limitation in  
299 that a translation block (i.e. starvation mimicking condition) could be induced immediately upon  
300 addition of the inhibitors. By using *E. coli* tRNA turnover rates as a guide, we hypothesize that the  
301 pool of charged trp-tRNA or leu-tRNA would be depleted within seconds after treatment (43).  
302 This would allow more direct comparisons between research groups with less variability in  
303 experimental systems. In particular, the use of inhibitors circumvents the host cell's ability to  
304 regenerate amino acid pools through autophagy, which would occur in conditions where an amino  
305 acid is omitted from culture medium. Indeed, we observed that, under such conditions, although  
306 the absence of trp was sensed, as demonstrated by increased *trpB* transcripts, *euo* transcripts, a

307 marker of persistence, did not increase (Suppl. Fig. 2). This suggests that, for serovar L2, simply  
308 omitting amino acids from the culture medium is not sufficient to induce a *bona fide* persistence  
309 response.

310         These data indicate the ability of indolmycin and AN3365 to induce persistence by limiting  
311 *Chlamydia*'s use of a single specific amino acid by blocking the charging of its cognate tRNA.  
312 Considering the parallels in morphology, transcriptional response, and mode of stress caused by  
313 these compounds in comparison to IFN $\gamma$ , we conclude that the use of indolmycin and AN3365 in  
314 place of IFN $\gamma$  is a viable method to study amino acid starvation stress responses. Interestingly,  
315 indolmycin treatment replicates the key transcriptional and morphological phenotypes associated  
316 with IFN $\gamma$ -induced persistence, further supporting that tryptophan limitation is the main  
317 antichlamydial inhibitory mechanism of IFN $\gamma$  in human cells (11, 19). The transcriptional changes  
318 of *C. pneumoniae* in response to the inhibitors more closely mirrored IFN $\gamma$ -mediated persistence  
319 than *C. trachomatis* did. Given the slower growth rate of *C. pneumoniae*, this is not surprising.  
320 The greater heterogeneity in transcription responses between indolmycin and IFN $\gamma$  in *C.*  
321 *trachomatis* may be due to the organism's quicker developmental cycle and asynchronous nature.  
322 That being said, the difference between the tryptophan starvation condition in *C. pneumoniae*  
323 versus *C. trachomatis* was not more than four-fold and showed the same trends overall.

324         AN3365-induced leu starvation displayed noteworthy differences from the trp starvation  
325 conditions. Firstly, *groEL\_1* transcripts generally increased during the analysis in *C. trachomatis*.  
326 This is consistent with what we previously characterized as codon-dependent transcriptional  
327 changes during amino acid starvation as Hsp60\_1 contains 45 L residues (26). Secondly, *trpB*  
328 transcripts were not increased 4h after treatment, as expected since leu starvation should not  
329 activate expression of the *trpRBA* operon. However, 14h post treatment, there was an

330 approximately 3-fold increase in *trpB* levels, suggesting some de-repression of the operon. TrpR  
331 contains 11 leu residues including one LL motif. Therefore, the inability to efficiently translate the  
332 repressor over time may allow for gradual transcriptional activation of the operon. Alternatively,  
333 the recently described role for the iron-sensitive repressor, YtgR, in blocking transcription of  
334 *trpBA*, may also be important (44). The YtgCR protein contains approximately 60 leu residues  
335 with multiple LL motifs that likely prevent efficient translation of this sequence. This is under  
336 investigation, but we also observed transcriptional changes in the *ytg* operon (see below).

337         We recently demonstrated differences in transcript levels between the 5' and 3' ends of  
338 large monocistronic and polycistronic transcripts (26). We further connected this to Rho-  
339 dependent polarity prematurely terminating transcription in *trp*-codon rich transcripts during IFN $\gamma$ -  
340 mediated *trp* starvation (32). To determine whether the tRNA synthetase inhibitors could replicate  
341 the destabilization of the 3' end of a large transcript, we analyzed the abundance of the *ytgA* and  
342 *ytgD* transcripts. Consistent with what was previously observed for IFN $\gamma$ -mediated *trp* starvation,  
343 both indolmycin and AN3365 caused a disparity in transcript abundance between the 5' and 3'  
344 ends of the *ytg* operon. Interestingly, AN3365 caused a quick destabilization of *ytgD* transcripts in  
345 *C. trachomatis* before recovering to levels observed in *trp* starvation conditions. The reasons for  
346 this are not clear but are under investigation.

347         The tools described here to mimic specific amino acid starvation states, by blocking tRNA  
348 charging, in the absence of chemokines or other significant alterations to culture conditions will  
349 facilitate broad comparisons of chlamydial persistence between species. For example, *C. caviae*  
350 resists IFN $\gamma$ -mediated persistence by recycling the product of *trp* degradation, N-  
351 formylkynurenine, through a *trp* scavenging pathway (45). Indolmycin treatment will facilitate  
352 studies of *trp* starvation responses in this species. Likewise, these treatments can be used in mouse

353 cells, where IDO is not the primary antichlamydial effector (10, 46). Also of interest are other  
354 intracellular pathogens such as *Coxiella* or *Rickettsia*, as studying their response mechanisms to  
355 amino acid starvation could lead to a greater understanding of evolutionary strategies employed  
356 by obligate intracellular pathogens, which typically lack functional stringent responses, to adapt  
357 to this stress.

358         Following the validation of these compounds as tools to study persistence, we aim to  
359 further investigate the role of amino acid limitation in regulating the persistent state. With the  
360 ability to limit an amino acid other than trp, we can more rigorously test the hypothesis that trp  
361 limitation increases transcription of trp codon containing genes to determine if this is a broad  
362 response to amino acid limitation or perhaps something specific to trp (26). We can now also apply  
363 genetic tools to study amino acid starvation responses in *C. trachomatis* L2.

364

## 365 **Materials and Methods**

366 **Organisms and cell culture.** The human epithelial cell line HEP-2 was routinely cultivated at  
367 37°C with 5% CO<sub>2</sub> in Dulbecco's modified Eagle medium (DMEM; Gibco, Dun Laoghaire,  
368 Ireland) supplemented with 10% FBS. The HEP-2 cells were a kind gift of H. Caldwell  
369 (NIH/NIAID). *C. trachomatis* serovar L2 and *C. pneumoniae* AR39 EBs were harvested from  
370 infected HEP-2 cell cultures at 37°C and 35°C, respectively, with 5% CO<sub>2</sub> and density gradient  
371 purified. Purified EBs were titered for infectivity by determining inclusion-forming units (IFU) on  
372 fresh cell monolayers. All bacterial and eukaryotic cell stocks were confirmed to be *Mycoplasma*  
373 negative using the LookOut Mycoplasma PCR Detection Kit (Sigma, St. Louis, MO).

374

375 Indolmycin was purchased from Cayman Chemical (Ann Arbor, MI) and resuspended to 120 mM  
376 in dimethyl sulfoxide (DMSO; Sigma). Aliquots were kept at -80°C and used only once to avoid  
377 freeze-thawing. Indolmycin was used at 120 µM and added at 10 hpi (*C. trachomatis*) or 24 hpi  
378 (*C. pneumoniae*) in all experiments. Immediately prior to treatment, cell medium was replaced  
379 with DMEM lacking trp (made in-house) to enhance the inhibitory effects of indolmycin. DMEM  
380 lacking trp was made using 10% fetal bovine serum that had been dialyzed to remove any  
381 additional amino acids. All custom medium components were purchased from Sigma.

382

383 AN3365 was purchased from Cayman Chemical and resuspended to 5 mg mL<sup>-1</sup> in DMSO.  
384 Aliquots were kept at -20°C and allowed one additional freeze-thaw. AN3365 concentration was  
385 titrated to induce persistence without completely stalling development and was used at 1 µg mL<sup>-1</sup>  
386 with treatment at 10 hpi (*C. trachomatis*) or 24 hpi (*C. pneumoniae*). No modifications to DMEM

387 were necessary. In some experiments with *C. trachomatis*, AN3365 was added at different  
388 concentrations or at different times post-infection as indicated, with IFU samples collected at  
389 24hpi.

390

391 Recombinant human interferon gamma (IFN $\gamma$ ) was purchased from Cell Sciences (Canton, MA)  
392 and resuspended to 100  $\mu\text{g ml}^{-1}$  in 0.1% bovine serum albumin (BSA; Sigma) diluted in water.  
393 Aliquots were frozen at  $-80^{\circ}\text{C}$  and used only once to avoid freeze-thawing. IFN $\gamma$  was titrated for  
394 its effect to induce persistence without killing the bacteria and, in our experiments, 0.5  $\text{ng ml}^{-1}$  was  
395 added to cells approximately 11 h prior to infection. Medium was replaced at 10 hpi with IFN $\gamma$ -  
396 conditioned medium (ICM) to induce persistence in *C. trachomatis* as described (32). ICM was  
397 prepared by adding 2  $\text{ng ml}^{-1}$  IFN $\gamma$  to uninfected HEp-2 cells for approximately 54 h prior to  
398 collection and filtration of the medium. *C. pneumoniae* experiments were treated with 2  $\text{ng ml}^{-1}$  at  
399 the time of infection.

400

401 **Inclusion Forming Unit (IFU) assays.** Infectious progeny were determined based on inclusions  
402 formed from a secondary infection. Primary infection samples were harvested by scraping cells in  
403 2 sucrose-phosphate (2SP) solution. Samples were lysed via a single freeze-thaw cycle and  
404 allowed to infect a fresh cell monolayer. Titers were enumerated by immunofluorescence.

405

406 **Immunofluorescent microscopy.** Cells were cultured on glass coverslips in 24-well tissue  
407 cultures plates and infected with *C. trachomatis* at an MOI of 1 or *C. pneumoniae* at an MOI of 2.  
408 All cells were fixed in 100% methanol. Organisms were stained using a primary goat or mouse



409 antibody specific to either *C. trachomatis* or *C. pneumoniae* major outer membrane protein  
410 (MOMP), respectively, and a donkey anti-goat or anti-mouse secondary antibody conjugated to  
411 Alexa Fluor 488 (Jackson Labs, Bar Harbor, Maine). Where applicable, a primary mouse (Ctr) or  
412 rabbit (Cpn) antibody specific to chlamydial Hsp60 was also used in conjunction with a secondary  
413 donkey anti-mouse or anti-rabbit antibody conjugated to Alexa Fluor 594 (Jackson Labs).

414

415 **Nucleic acid extraction and RT-qPCR.** RNA extraction was performed on infected cell  
416 monolayers using TRIzol (Invitrogen/ThermoFisher). Samples were treated with Turbo DNase  
417 (Ambion/ThermoFisher) according to the manufacturer's instructions to remove DNA  
418 contamination. cDNA was synthesized from DNA-free RNA using random nonamers (New  
419 England BioLabs, Ipswich, MA) and SuperScript III RT (Invitrogen/ThermoFisher) per  
420 manufacturer's instructions. Reaction end products were diluted 10 fold with molecular biology-  
421 grade water, aliquoted for later use, and stored at -80°C. Equal volumes of each reaction mixture  
422 were used in 25 µL qPCR mixtures with SYBR green master mix (Applied Biosystems) and  
423 quantified on a Quant Studio 3 (Applied Biosystems/ThermoFisher) using the standard  
424 amplification cycle with a melting curve analysis. Results were compared to a standard curve  
425 generated against purified *C. trachomatis* L2 or *C. pneumoniae* genomic DNA as appropriate.  
426 DNA samples were collected from replicate wells during the same experiments using the DNeasy  
427 Blood and Tissue kit (Qiagen, Hilden, Germany). Equal total DNA quantities were used in qPCR  
428 with a *groEL1* primer set to quantify chlamydial genomes. Genome values were used to normalize  
429 respective transcript data. RT-qPCR results were normalized for efficiency with typical results  
430 demonstrating  $r^2 > 0.995$  and efficiencies greater than 90%.

431

432 **Reactivation.** To determine the possibility of recovery from persistence, samples were treated or  
433 not with AN3365 or indolmycin as described above. After 24 hours post infection, all samples  
434 were washed three times with DPBS and given fresh medium. Samples were allowed to recover  
435 for an additional 24 or 48 hours before collection for IFU assay or fixation for immunofluorescent  
436 microscopy.

437 **Electron Microscopy.** HEp-2 cells were cultured in a 6-well plate and infected with *C.*  
438 *trachomatis* serovar L2 at an MOI of 2.5. Samples were treated or not with indolmycin or AN3365  
439 at 10 hpi. Cells were trypsinized at 24 hpi and pelleted at 500 xg for 5 minutes. Pellets were washed  
440 3x using DPBS. Following the final wash, pellets were resuspended in 1 mL of fixative containing  
441 2% glutaraldehyde, 2% paraformaldehyde, and 0.1M Sorenson's phosphate buffer, pH 7.2. Post  
442 fixation was carried out using 1% Osmium Tetroxide followed by a dehydration series in  
443 increasing EtOH concentrations. 90 nm sections were cut using a Leica UC6 Ultramicrotome with  
444 a Diatome diamond knife. Sections were stained in 2% Uranyl Acetate and Reynold's Lead Citrate.  
445 Images were collected on an FEI Tecnai G2 TEM operated at 80 Kv.

446

#### 447 **Acknowledgements**

448 This work was supported by start-up funds from the University of Nebraska Medical Center as  
449 well as a CAREER award (1810599) from the National Science Foundation to SPO. We thank Dr.  
450 H. Caldwell (NIAID/NIH) for eukaryotic cell stocks and the antibody to *C. pneumoniae* MOMP,  
451 Dr. R. Morrison (UAMS) for the antibody to chlamydial Hsp60\_1, Dr. E. Rucks (UNMC) for the  
452 antibody against *Chlamydia* and for critical review of the manuscript, and Dr. R. Carabeo (UNMC)  
453 for critical review of the manuscript. We would also like to thank Tom Bargar and Nicholas

454 Conoan of the Electron Microscopy Core Facility (EMCF) at the University of Nebraska Medical  
455 Center for technical assistance. The EMCF is supported by state funds from the Nebraska Research  
456 Initiative (NRI) and the University of Nebraska Foundation, and institutionally by the Office of  
457 the Vice Chancellor for Research.

458 This publication's contents and interpretations are the sole responsibility of the authors.

459 We declare that we have no conflict of interest.

460

461 **Literature Cited**

- 462 1. CDC. 2018. Sexually Transmitted Disease Surveillance 2017. Services AUSDoHaH,  
463 Atlanta: U.S. Department of Health and Human Services.
- 464 2. Satterwhite CL, Torrone E, Meites E, Dunne EF, Mahajan R, Ocfemia MC, Su J, Xu F,  
465 Weinstock H. 2013. Sexually transmitted infections among US women and men:  
466 prevalence and incidence estimates, 2008. *Sex Transm Dis* 40:187-93.
- 467 3. Brunham RC, Maclean IW, Binns B, Peeling RW. 1985. Chlamydia trachomatis: Its Role  
468 in Tubal Infertility. *The Journal of Infectious Diseases* 152:1275-1282.
- 469 4. Kuo CC, Jackson LA, Campbell LA, Grayston JT. 1995. Chlamydia pneumoniae  
470 (TWAR). *Clinical microbiology reviews* 8:451-461.
- 471 5. Saikku P, Leinonen M, Mattila K, Ekman MR, Nieminen MS, Makela PH, Huttunen JK,  
472 Valtonen V. 1988. Serological evidence of an association of a novel Chlamydia, TWAR,  
473 with chronic coronary heart disease and acute myocardial infarction. *Lancet* 2:983-6.
- 474 6. Hahn DL. 1995. Treatment of Chlamydia pneumoniae infection in adult asthma: a before-  
475 after trial. *J Fam Pract* 41:345-51.
- 476 7. AbdelRahman YM, Belland RJ. 2005. The chlamydial developmental cycle. *FEMS*  
477 *Microbiology Reviews* 29:949-959.

- 478 8. Moore ER, Ouellette SP. 2014. Reconceptualizing the chlamydial inclusion as a  
479 pathogen-specified parasitic organelle: an expanded role for Inc proteins. *Frontiers in*  
480 *Cellular and Infection Microbiology* 4.
- 481 9. Abdelrahman Y, Ouellette SP, Belland RJ, Cox JV. 2016. Polarized Cell Division of  
482 *Chlamydia trachomatis*. *PLOS Pathogens* 12:e1005822.
- 483 10. Perry LL, Feilzer K, Caldwell HD. 1997. Immunity to *Chlamydia trachomatis* is  
484 mediated by T helper 1 cells through IFN-gamma-dependent and -independent pathways.  
485 *The Journal of Immunology* 158:3344.
- 486 11. Byrne GI, Lehmann LK, Landry GJ. 1986. Induction of tryptophan catabolism is the  
487 mechanism for gamma-interferon-mediated inhibition of intracellular *Chlamydia psittaci*  
488 replication in T24 cells. *Infect Immun* 53:347-51.
- 489 12. Beatty WL, Morrison RP, Byrne GI. 1994. Immunoelectron-microscopic quantitation of  
490 differential levels of chlamydial proteins in a cell culture model of persistent *Chlamydia*  
491 *trachomatis* infection. *Infection and immunity* 62:4059-4062.
- 492 13. Lewis ME, Belland RJ, AbdelRahman YM, Beatty WL, Aiyar AA, Zea AH, Greene SJ,  
493 Marrero L, Buckner LR, Tate DJ, McGowin CL, Kozlowski PA, O'Brien M, Lillis RA,  
494 Martin DH, Quayle AJ. 2014. Morphologic and molecular evaluation of *Chlamydia*  
495 *trachomatis* growth in human endocervix reveals distinct growth patterns. *Frontiers in*  
496 *Cellular and Infection Microbiology* 4.

- 497 14. Pfefferkorn ER. 1984. Interferon gamma blocks the growth of *Toxoplasma gondii* in  
498 human fibroblasts by inducing the host cells to degrade tryptophan. *Proceedings of the*  
499 *National Academy of Sciences of the United States of America* 81:908-912.
- 500 15. Boehm U, Klamp T, Groot M, Howard JC. 1997. Cellular responses to interferon-  
501 gamma. *Annu Rev Immunol* 15:749-95.
- 502 16. Beatty WL, Byrne GI, Morrison RP. 1993. Morphologic and antigenic characterization of  
503 interferon gamma-mediated persistent *Chlamydia trachomatis* infection in vitro. *Proc*  
504 *Natl Acad Sci U S A* 90:3998-4002.
- 505 17. Kane CD, Vena RM, Ouellette SP, Byrne GI. 1999. Intracellular tryptophan pool sizes  
506 may account for differences in gamma interferon-mediated inhibition and persistence of  
507 chlamydial growth in polarized and nonpolarized cells. *Infection and immunity* 67:1666-  
508 1671.
- 509 18. Ouellette SP, Hatch TP, AbdelRahman YM, Rose LA, Belland RJ, Byrne GI. 2006.  
510 Global transcriptional upregulation in the absence of increased translation in *Chlamydia*  
511 during IFN $\gamma$ -mediated host cell tryptophan starvation. *Molecular Microbiology* 62:1387-  
512 1401.
- 513 19. Ibana JA, Belland RJ, Zea AH, Schust DJ, Nagamatsu T, AbdelRahman YM, Tate DJ,  
514 Beatty WL, Aiyar AA, Quayle AJ. 2011. Inhibition of indoleamine 2,3-dioxygenase

- 515 activity by levo-1-methyl tryptophan blocks gamma interferon-induced Chlamydia  
516 trachomatis persistence in human epithelial cells. *Infection and immunity* 79:4425-4437.
- 517 20. Leonhardt RM, Lee S-J, Kavathas PB, Cresswell P. 2007. Severe Tryptophan Starvation  
518 Blocks Onset of Conventional Persistence and Reduces Reactivation of  
519 <em>&lt;/em>Chlamydia trachomatis</em>. *Infection and Immunity* 75:5105.
- 520 21. Thomas SM, Garrity LF, Brandt CR, Schobert CS, Feng GS, Taylor MW, Carlin JM,  
521 Byrne GI. 1993. IFN-gamma-mediated antimicrobial response. Indoleamine 2,3-  
522 dioxygenase-deficient mutant host cells no longer inhibit intracellular Chlamydia spp. or  
523 Toxoplasma growth. *The Journal of Immunology* 150:5529.
- 524 22. Stephens RS, Kalman S, Lammel C, Fan J, Marathe R, Aravind L, Mitchell W, Olinger  
525 L, Tatusov RL, Zhao Q, Koonin EV, Davis RW. 1998. Genome sequence of an obligate  
526 intracellular pathogen of humans: Chlamydia trachomatis. *Science* 282:754-9.
- 527 23. Zomorodipour A, Andersson SGE. 1999. Obligate intracellular parasites: Rickettsia  
528 prowazekii and Chlamydia trachomatis. *FEBS Letters* 452:11-15.
- 529 24. Hogan RJ, Mathews SA, Mukhopadhyay S, Summersgill JT, Timms P. 2004. Chlamydial  
530 persistence: beyond the biphasic paradigm. *Infection and immunity* 72:1843-1855.
- 531 25. Beatty WL, Morrison RP, Byrne GI. 1995. Reactivation of persistent Chlamydia  
532 trachomatis infection in cell culture. *Infect Immun* 63:199-205.

- 533 26. Ouellette SP, Rueden KJ, Rucks EA. 2016. Tryptophan Codon-Dependent Transcription  
534 in *Chlamydia pneumoniae* during Gamma Interferon-Mediated Tryptophan Limitation.  
535 *Infection and immunity* 84:2703-2713.
- 536 27. Ouellette SP, Dorsey FC, Moshiach S, Cleveland JL, Carabeo RA. 2011. *Chlamydia*  
537 species-dependent differences in the growth requirement for lysosomes. *PloS one*  
538 6:e16783-e16783.
- 539 28. Werner RG, Thorpe LF, Reuter W, Nierhaus KH. 1976. Indolmycin inhibits prokaryotic  
540 tryptophanyl-tRNA ligase. *Eur J Biochem* 68:1-3.
- 541 29. Hernandez V, Crépin T, Palencia A, Cusack S, Akama T, Baker SJ, Bu W, Feng L,  
542 Freund YR, Liu L, Meewan M, Mohan M, Mao W, Rock FL, Sexton H, Sheoran A,  
543 Zhang Y, Zhang Y-K, Zhou Y, Nieman JA, Anugula MR, Keramane EM, Savariraj K,  
544 Reddy DS, Sharma R, Subedi R, Singh R, O'Leary A, Simon NL, De Marsh PL, Mushtaq  
545 S, Warner M, Livermore DM, Alley MRK, Plattner JJ. 2013. Discovery of a novel class  
546 of boron-based antibacterials with activity against gram-negative bacteria. *Antimicrobial*  
547 *agents and chemotherapy* 57:1394-1403.
- 548 30. Belland RJ, Nelson DE, Virok D, Crane DD, Hogan D, Sturdevant D, Beatty WL,  
549 Caldwell HD. 2003. Transcriptome analysis of chlamydial growth during IFN-gamma-  
550 mediated persistence and reactivation. *Proc Natl Acad Sci U S A* 100:15971-6.



- 551 31. Akers JC, Tan M. 2006. Molecular Mechanism of Tryptophan-Dependent Transcriptional  
552 Regulation in *Chlamydia trachomatis*. Journal of Bacteriology  
553 188:4236.
- 554 32. Ouellette SP, Messerli PR, Wood NA, Hajovsky H. 2018. Characterization of Chlamydial  
555 Rho and the Role of Rho-Mediated Transcriptional Polarity during Interferon Gamma-  
556 Mediated Tryptophan Limitation. Infection and Immunity 86:e00240-18.
- 557 33. Østergaard O, Follmann F, Olsen AW, Heegaard NH, Andersen P, Rosenkrands I. 2016.  
558 Quantitative Protein Profiling of *Chlamydia trachomatis* Growth Forms Reveals Defense  
559 Strategies Against Tryptophan Starvation. Molecular & cellular proteomics : MCP  
560 15:3540-3550.
- 561 34. Lo C-C, Xie G, Bonner CA, Jensen RA. 2012. The alternative translational profile that  
562 underlies the immune-evasive state of persistence in Chlamydiaceae exploits differential  
563 tryptophan contents of the protein repertoire. Microbiology and molecular biology  
564 reviews : MMBR 76:405-443.
- 565 35. Wang Y, Kahane S, Cutcliffe LT, Skilton RJ, Lambden PR, Clarke IN. 2011.  
566 Development of a Transformation System for *Chlamydia trachomatis*: Restoration of  
567 Glycogen Biosynthesis by Acquisition of a Plasmid Shuttle Vector. PLOS Pathogens  
568 7:e1002258.

- 569 36. Johnson CM, Fisher DJ. 2014. Site-Specific, Insertional Inactivation of *incA* in  
570 *Chlamydia trachomatis* Using a Group II Intron. PLOS ONE 8:e83989.
- 571 37. Ouellette SP. 2018. Feasibility of a Conditional Knockout System for *Chlamydia* Based  
572 on CRISPR Interference. Frontiers in cellular and infection microbiology 8:59-59.
- 573 38. Mueller KE, Wolf K, Fields KA. 2016. Gene Deletion by Fluorescence-Reported Allelic  
574 Exchange Mutagenesis in *Chlamydia trachomatis*;  
575 *Chlamydia trachomatis*. mBio  
576 7:e01817-15.
- 577 39. Agaisse H, Derré I. 2013. A *C. trachomatis* Cloning Vector and the Generation of *C.*  
578 *trachomatis* Strains Expressing Fluorescent Proteins under the Control of a *C. trachomatis*  
579 Promoter. PLOS ONE 8:e57090.
- 580 40. Bauler LD, Hackstadt T. 2014. Expression and Targeting of Secreted Proteins from  
581 *Chlamydia trachomatis*;  
582 *Chlamydia trachomatis*. Journal of Bacteriology 196:1325.
- 583 41. Miyairi I, Mahdi OS, Ouellette SP, Belland RJ, Byrne GI. 2006. Different Growth Rates  
584 of *Chlamydia trachomatis* Biovars Reflect Pathotype. The Journal of Infectious Diseases  
585 194:350-357.

- 586 42. Mendes RE, Alley MRK, Sader HS, Biedenbach DJ, Jones RN. 2013. Potency and  
587 spectrum of activity of AN3365, a novel boron-containing protein synthesis inhibitor,  
588 tested against clinical isolates of Enterobacteriaceae and nonfermentative Gram-negative  
589 bacilli. *Antimicrobial agents and chemotherapy* 57:2849-2857.
- 590 43. Jakubowski H, Goldman E. 1984. Quantities of individual aminoacyl-tRNA families and  
591 their turnover in *Escherichia coli*. *Journal of bacteriology* 158:769-776.
- 592 44. Pokorzynski ND, Brinkworth AJ, Carabeo R. 2019. A bipartite iron-dependent  
593 transcriptional regulation of the tryptophan salvage pathway in *Chlamydia trachomatis*.  
594 *eLife* 8:e42295.
- 595 45. Read TD, Myers GSA, Brunham RC, Nelson WC, Paulsen IT, Heidelberg J, Holtzapple  
596 E, Khouri H, Federova NB, Carty HA, Umayam LA, Haft DH, Peterson J, Beanan MJ,  
597 White O, Salzberg SL, Hsia Rc, McClarty G, Rank RG, Bavoil PM, Fraser CM. 2003.  
598 Genome sequence of *Chlamydomphila caviae* (*Chlamydia psittaci* GPIC): examining the  
599 role of niche-specific genes in the evolution of the Chlamydiaceae. *Nucleic Acids*  
600 *Research* 31:2134-2147.
- 601 46. Ramsey KH, Miranpuri GS, Sigar IM, Ouellette S, Byrne GI. 2001. *Chlamydia*  
602 *trachomatis* persistence in the female mouse genital tract: inducible nitric oxide synthase  
603 and infection outcome. *Infection and immunity* 69:5131-5137.
- 604



606 **Figure Legends**

607 **Figure 1.** A flowchart illustrating the events leading to IFN $\gamma$ -mediated persistence. By using tRNA  
608 synthetase inhibitors to affect translation, a more direct route to persistence is achieved.

609

610 **Figure 2.** Indolmycin and AN3365 effectively reduce recoverable infectious elementary bodies.  
611 For all experiments, HEp-2 cells were infected with *C. trachomatis* L2, and inclusion forming  
612 units (IFUs) were collected at 24 hpi and titrated on a fresh monolayer of HEp-2 cells in the  
613 absence of antibiotics. A) Indolmycin was added at 120  $\mu$ M at 10 hpi. B) Effect of various doses  
614 of AN3365 on IFU production when added at 10 hpi. C) AN3365 was added at different times post  
615 infection at 1  $\mu$ g mL<sup>-1</sup> as indicated. Data are representative of three separate biological replicates.  
616 Error bars represent the standard deviation between biological replicates.

617

618 **Figure 3.** Inhibition of tRNA synthetase results in morphological aberrance in *C. trachomatis* L2.  
619 Representative images of HEp-2 cells infected with *C. trachomatis* and treated or not as indicated.  
620 Cells were fixed and stained 24 hpi using primary antibodies to Major Outer Membrane Protein  
621 (MOMP) and chlamydial Hsp60\_1. Indolmycin and AN3365 treatments resulted in smaller  
622 inclusions and morphologically aberrant organisms similar to IFN $\gamma$  treated organisms. All images  
623 were acquired on Zeiss LSM 800 confocal microscope with Airyscan at 63x optical magnification  
624 with 2x digital zoom. Scale bars represent 5  $\mu$ m.

625

626 **Figure 4.** Removal of indolmycin and AN3365 allows reactivation from persistence. HEp-2 cells  
627 were infected with *C. trachomatis* and treated or not with the designated tRNA synthetase inhibitor  
628 at 10 hpi. DMEM was removed at 24 hpi followed by three DPBS washes and replenishment with  
629 unmodified DMEM. Cultures were allowed to recover for an additional 24 or 48 hours before  
630 fixation. A) IFU samples were collected from replicate wells at designated points throughout the  
631 experiment. Error bars represent variability between three biological replicates. B) Representative  
632 images of untreated *C. trachomatis* infected HEp-2 cells at 24 or 48 hpi. C & D) Representative  
633 images of indolmycin (C) or AN3365 (D) treated *C. trachomatis* infected HEp-2 cells at 24, 48  
634 (24h reactivation = react.), or 72 (48h react.) hpi. All images were acquired on an AXIO Imager.Z2  
635 with ApoTome.2 at 100x magnification. Scale bars represent 5  $\mu$ m.

636

637 **Figure 5.** Immunofluorescent images of HEp-2 cultures infected with *C. pneumoniae* at 48 hpi  
638 show morphological similarity between indolmycin and AN3365 treatments with IFN $\gamma$ -induced  
639 persistent organisms. Indolmycin and AN3365 were added at 24 hpi. IFN $\gamma$  was added at time of  
640 infection. All images were acquired on an AXIO Imager.Z2 with ApoTome.2 at 100x  
641 magnification. Scale bars represent 5  $\mu$ m.

642

643 **Figure 6.** Transcriptional changes in *Chlamydia* consistent with persistence can be detected during  
644 indolmycin and AN3365 treatment. A) Transcripts of *euo* are elevated in *C. trachomatis* (Ctr) or  
645 *C. pneumoniae* (Cpn) following treatments with indolmycin, AN3365, or IFN $\gamma$ . B) Under standard  
646 conditions, *groEL\_1* transcripts in *C. trachomatis* decrease between 10 and 24 hpi. However,  
647 treatment with indolmycin results in unchanged transcript levels, similar to what is seen in IFN $\gamma$

648 treated samples, while AN3365 treatment results in higher transcript levels. In *C. pneumoniae*, no  
649 significant change is seen between 24 and 48 hours under any treatment, in agreement with  
650 previous reports investigating IFN $\gamma$  exposure. C) *trpB* transcripts accumulate at 14 hpi as expected  
651 in indolmycin and IFN $\gamma$  treated samples, but not in AN3365. At 24 hpi, AN3365 treated samples  
652 exhibit a slight (3-4 fold) increase in *trpB*.

653

654 **Figure 7.** Transcriptional analysis shows a decrease in readthrough efficiency of the *ytgABCD*  
655 operon during indolmycin, AN3365, or IFN $\gamma$  treatment in A) *C. trachomatis* (Ctr) or B) *C.*  
656 *pneumoniae* (Cpn). RT-qPCR was performed to determine ng of cDNA of both *ytgA* and *ytgD*.  
657 Each was normalized to gDNA collected from replicate wells and expressed as a ratio of ng cDNA  
658 per ng gDNA of *ytgA* over *ytgD*.

659

660 **Supplemental Figure 1.** Electron micrograph images were collected to examine the  
661 morphological impact of indolmycin and AN3365 on *C. trachomatis*. HEp-2 cells were infected  
662 with *C. trachomatis* at an MOI of 2.5 and treated or not with the denoted tRNA synthetase  
663 inhibitor. Samples were collected and fixed at 24 hpi. Images were acquired on an FEI Tecnai G2  
664 TEM operated at 80 Kv. Scale bars represent 2  $\mu$ m, 500 nm, and 500 nm, respectively.

665

666 **Supplemental Figure 2.** Trp deplete media induces an increase in *trpB*, but not *euo*, transcripts.  
667 HEp-2 cultures were infected with *C. trachomatis* at an MOI of 1. At 10 hpi, DMEM was replaced  
668 with standard DMEM (Untreated), DMEM lacking trp (No trp), or DMEM lacking trp with 120  
669  $\mu$ M indolmycin (Indolmycin). RNA transcripts were analyzed via RT-qPCR to compare the

670 efficacy of trp deplete media in inducing persistence, as measured by increased *euo* transcript  
671 levels.

672

673 **Supplemental Table 1.** All primer sequences used for qPCR analysis of a given transcript.



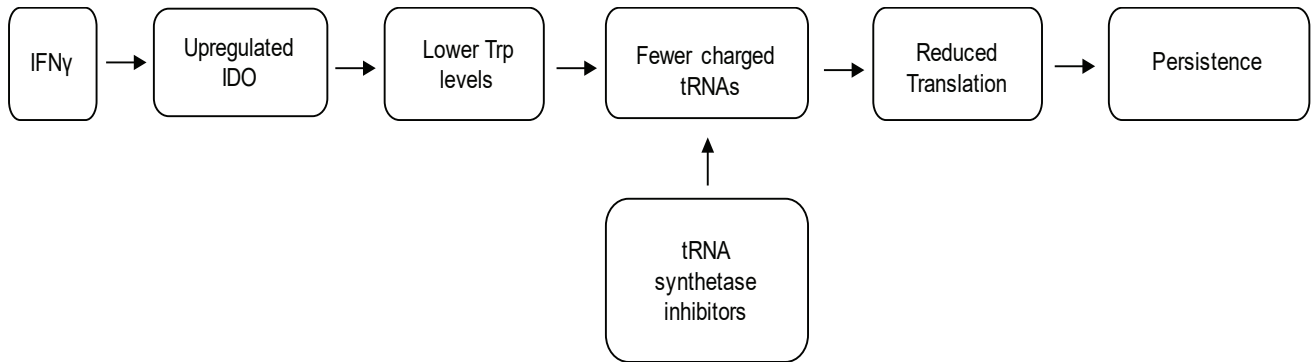

Figure 1. A flowchart illustrating the events leading to IFN $\gamma$ -mediated persistence. By using tRNA synthetase inhibitors to affect translation, a more direct route to persistence is achieved.

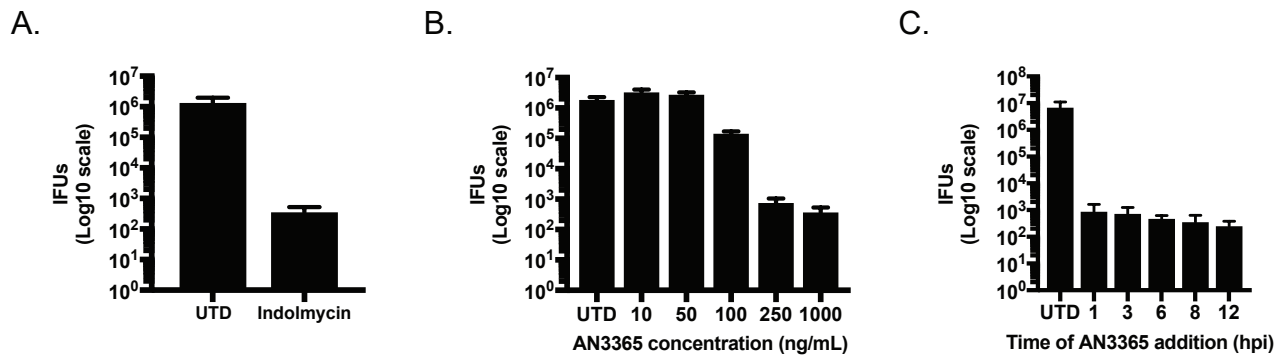

**Figure 2.** Indolmycin and AN3365 effectively reduce recoverable infectious elementary bodies. For all experiments, HEp-2 cells were infected with *C. trachomatis* L2, and inclusion forming units (IFUs) were collected at 24 hpi and titrated on a fresh monolayer of HEp-2 cells in the absence of antibiotics. A) Indolmycin was added at 120  $\mu$ M at 10 hpi. B) Effect of various doses of AN3365 on IFU production when added at 10 hpi. C) AN3365 was added at different times post infection at 1  $\mu$ g mL<sup>-1</sup> as indicated. Data are representative of three separate biological replicates. Error bars represent the standard deviation between biological replicates.

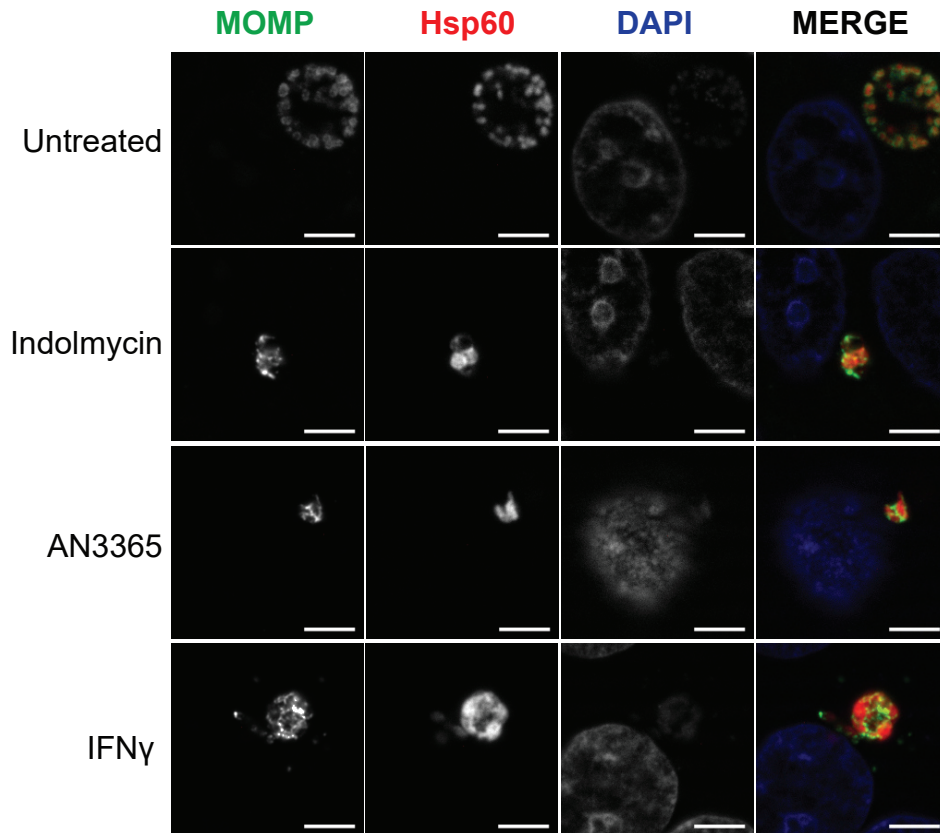

**Figure 3.** Inhibition of tRNA synthetase results in morphological aberrance in *C. trachomatis* L2. Representative images of HEP-2 cells infected with *C. trachomatis* and treated or not as indicated. Cells were fixed and stained 24 hpi using primary antibodies to Major Outer Membrane Protein (MOMP) and chlamydial Hsp60\_1. Indolmycin and AN3365 treatments resulted in smaller inclusions and morphologically aberrant organisms similar to IFN $\gamma$  treated organisms. All images were acquired on Zeiss LSM 800 confocal microscope with Airyscan at 63x optical magnification with 2x digital zoom. Scale bars represent 5  $\mu$ m.

A.

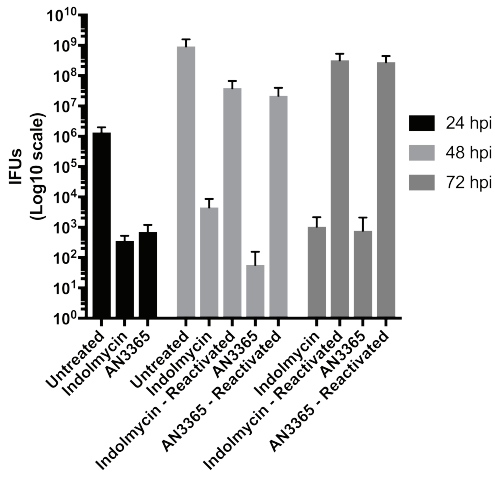

B. Untreated

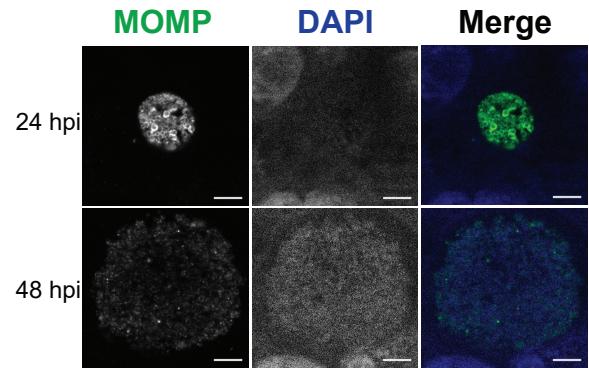

C. Indolmycin

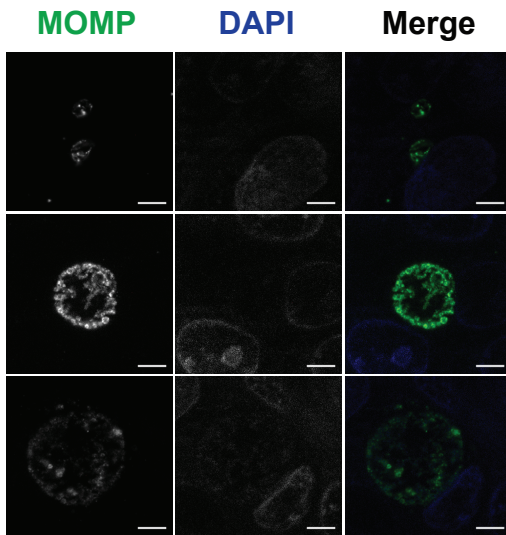

D. AN3365

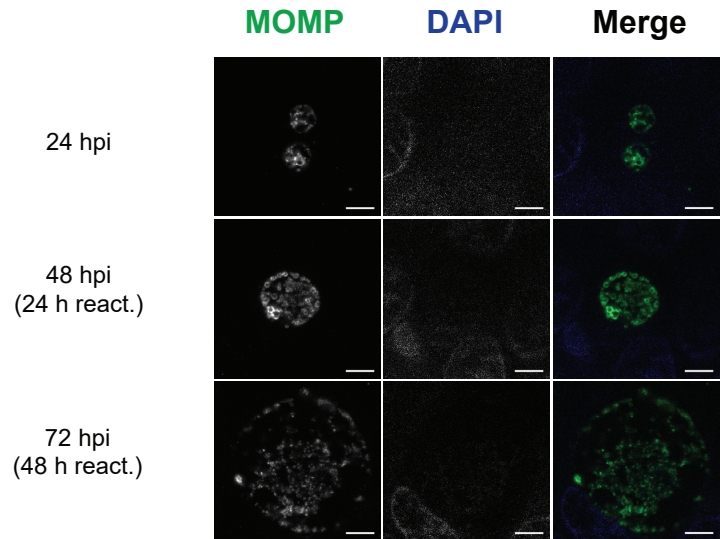

**Figure 4.** Removal of indolmycin and AN3365 allows reactivation from persistence. HEp-2 cells were infected with *C. trachomatis* and treated or not with the designated tRNA synthetase inhibitor at 10 hpi. DMEM was removed at 24 hpi followed by three DPBS washes and replenishment with unmodified DMEM. Cultures were allowed to recover for an additional 24 or 48 hours before fixation. A) IFU samples were collected from replicate wells at designated points throughout the experiment. Error bars represent variability between three biological replicates. B) Representative images of untreated *C. trachomatis* infected HEp-2 cells at 24 or 48 hpi. C & D) Representative images of indolmycin (C) or AN3365 (D) treated *C. trachomatis* infected HEp-2 cells at 24, 48 (24h reactivation = react.), or 72 (48h react.) hpi. All images were acquired on an AXIO Imager.Z2 with ApoTome.2 at 100x magnification. Scale bars represent 5 μm.

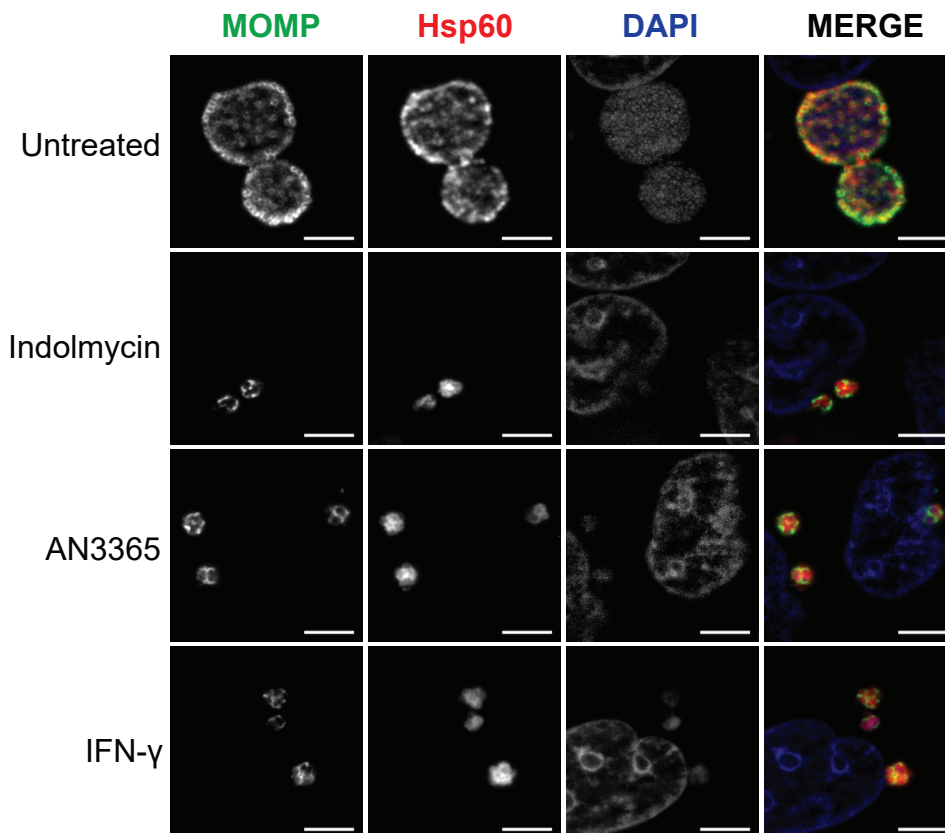

Figure 5. Immunofluorescent images of HEp-2 cultures infected with *C. pneumoniae* at 48 hpi show morphological similarity between indolmycin and AN3365 treatments with IFN $\gamma$  induced persistent organisms. Indolmycin and AN3365 were added at 24 hpi. IFN $\gamma$  was added at time of infection. All images were acquired on an AXIO Imager.Z2 with ApoTome.2 at 100x magnification. Scale bars represent 5  $\mu$ m.

A.

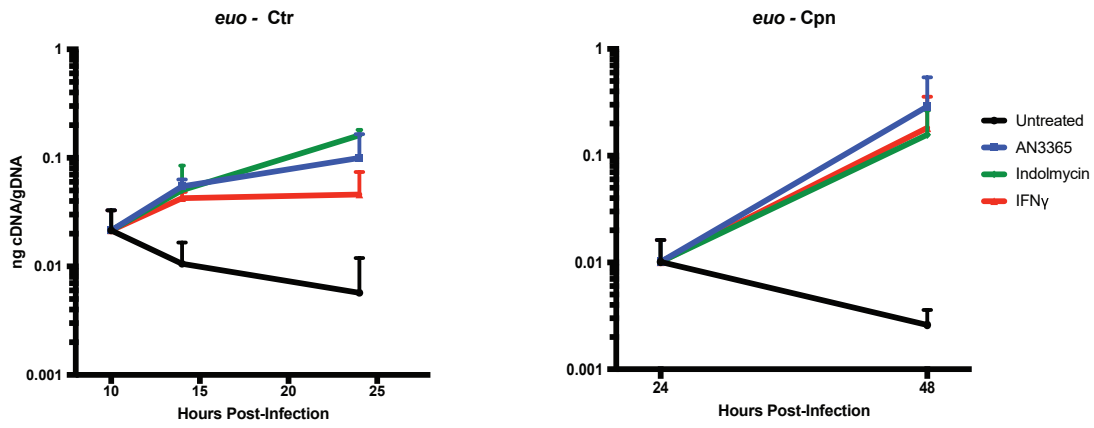

B.

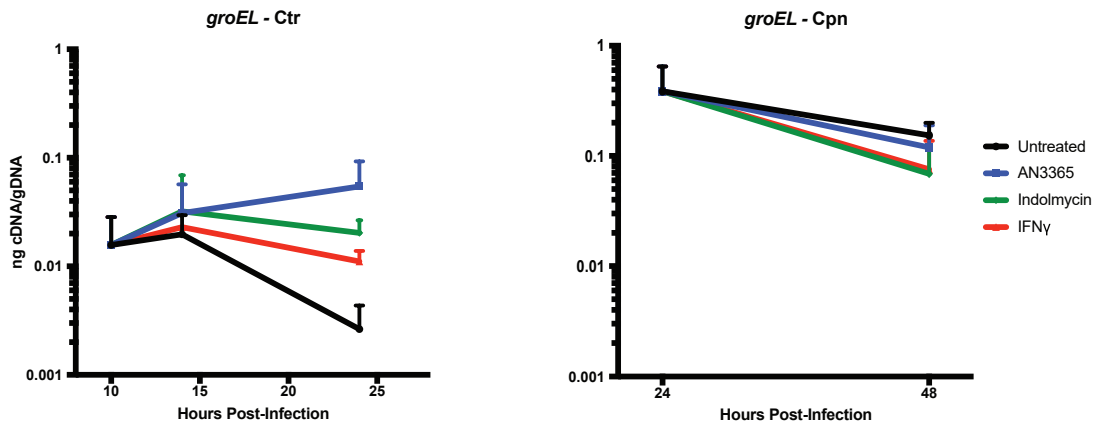

C.

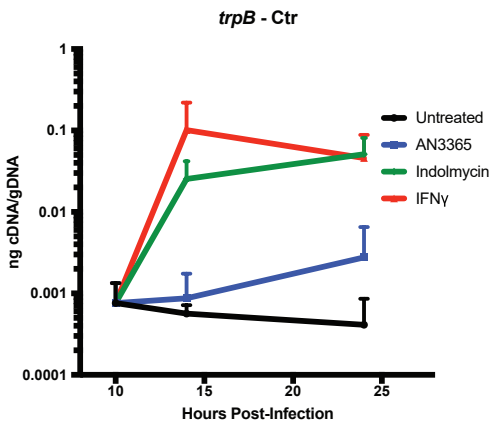

Figure 6. Transcriptional changes in Chlamydia consistent with persistence can be detected during indolmycin and AN3365 treatment. A) Transcripts of *euo* are elevated in *C. trachomatis* (Ctr) or *C. pneumoniae* (Cpn) following treatments with indolmycin, AN3365, or IFN $\gamma$ . B) Under standard conditions, *groEL\_1* transcripts in *C. trachomatis* decrease between 10 and 24 hpi. However, treatment with indolmycin results in unchanged transcript levels, similar to what is seen in IFN $\gamma$  treated samples, while AN3365 treatment results in higher transcript levels. In *C. pneumoniae*, no significant change is seen between 24 and 48 hours under any treatment, in agreement with previous reports investigating IFN $\gamma$  exposure. C) *trpB* transcripts accumulate at 14 hpi as expected in indolmycin and IFN $\gamma$  treated samples, but not in AN3365. At 24 hpi, AN3365 treated samples exhibit a slight (3-4 fold) increase in *trpB*.

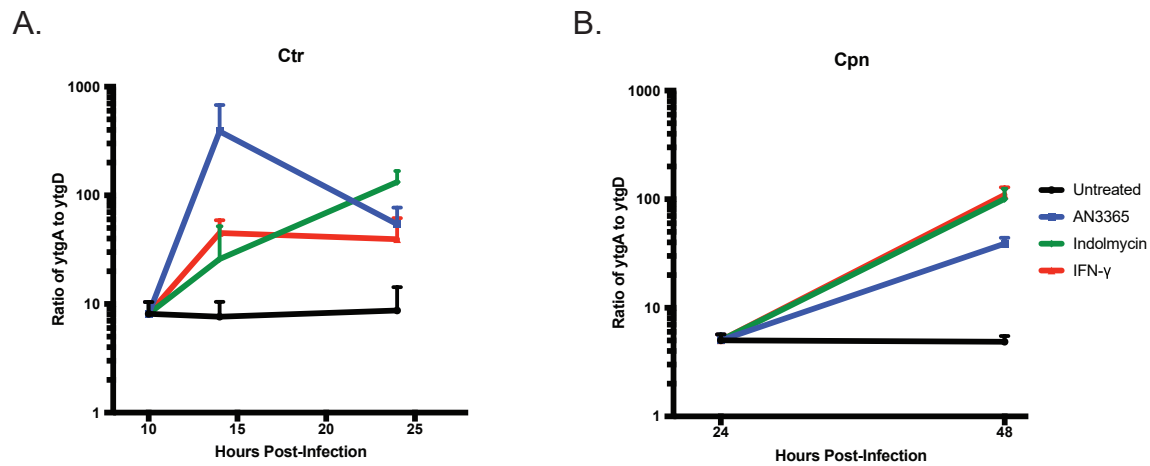

**Figure 7.** Transcriptional analysis shows a decrease in readthrough efficiency of the *ytgABCD* operon during indolmycin, AN3365, or IFN $\gamma$  treatment in A) *C. trachomatis* (Ctr) or B) *C. pneumoniae* (Cpn). RT-qPCR was performed to determine ng of cDNA of both *ytgA* and *ytgD*. Each was normalized to gDNA collected from replicate wells and expressed as a ratio of ng cDNA per ng gDNA of *ytgA* over *ytgD*.
